# Supplementary material for: Variation in wealth and educational drivers of fertility decline across 45 countries
Source: Springer Nature journal article supplement (doi:10.1007/s10144-018-0626-5), 2018-04-01
Supplement: MOESM1 [file 15826226]

## Supplementary Material

# Variation in wealth and educational drivers of fertility decline across 45 countries

Heidi Colleran and Kristin Snopkowski

---

### Contents:

**Figs. S1-S2** Distribution of (S1) wealth ranges and (S2) education ranges (measured in standard deviations) across countries.

**Figs. S3-S4** Supplementary plots of beta coefficients ( $\pm$  standard errors) of wealth (S3) and education (S4) on fertility for all countries with multiple waves of data in the DHS (85 waves in 36 countries), using unstandardized variables.

**Table S1** Sample characteristics by country for sample with one wave per country

**Table S2** Sample characteristics for second sample with multiple waves per country

**Table S3** Fixed model coefficients from the multilevel varying slopes model of wealth, education, and mediators on number of live births, fit by maximum likelihood using the Laplace approximation.

**Table S4** Varying slope coefficients for each country from the multilevel varying slopes model shown in Table S3 of ESM

**Table S5** Fixed model coefficients from the multilevel varying slopes model of wealth, education, and mediators on number of live births using unstandardized variables

**Table S6** Varying slope coefficients from the multilevel varying slopes model using unstandardized variables shown in Table S5 of ESM

**Table S7** Fixed model coefficients from the multilevel varying slopes model of wealth, education, and mediators on alternative outcome: number of living children

**Table S8** Varying slope coefficients from the multilevel varying slopes model of wealth, education, and mediators on alternative outcome: number of living children

**Table S9** Fixed model coefficients from the multilevel varying slopes model of wealth, education, and mediators on alternative outcome: number of living children using unstandardized variables

**Table S10** Varying slope coefficients from the multilevel varying slopes model of wealth, education, and mediators on alternative outcome: number of living children using unstandardized variables

**The following tables can be found in the Supplementary Materials Excel File**

**Table S11** Standardized coefficients (with standard errors) for paths in Structural Equation Models for each country.

**Table S12** Standardized coefficients (with standard errors) for paths in Structural Equation Models for each country with the alternative outcome: number of living children

**Table S13** Standardized coefficients (with standard errors) for paths in Structural Equation Models for each country with multiple waves. Color coded by whether the effect is increasing (green), decreasing (red), or inconsistent/staying the same (black) through time.

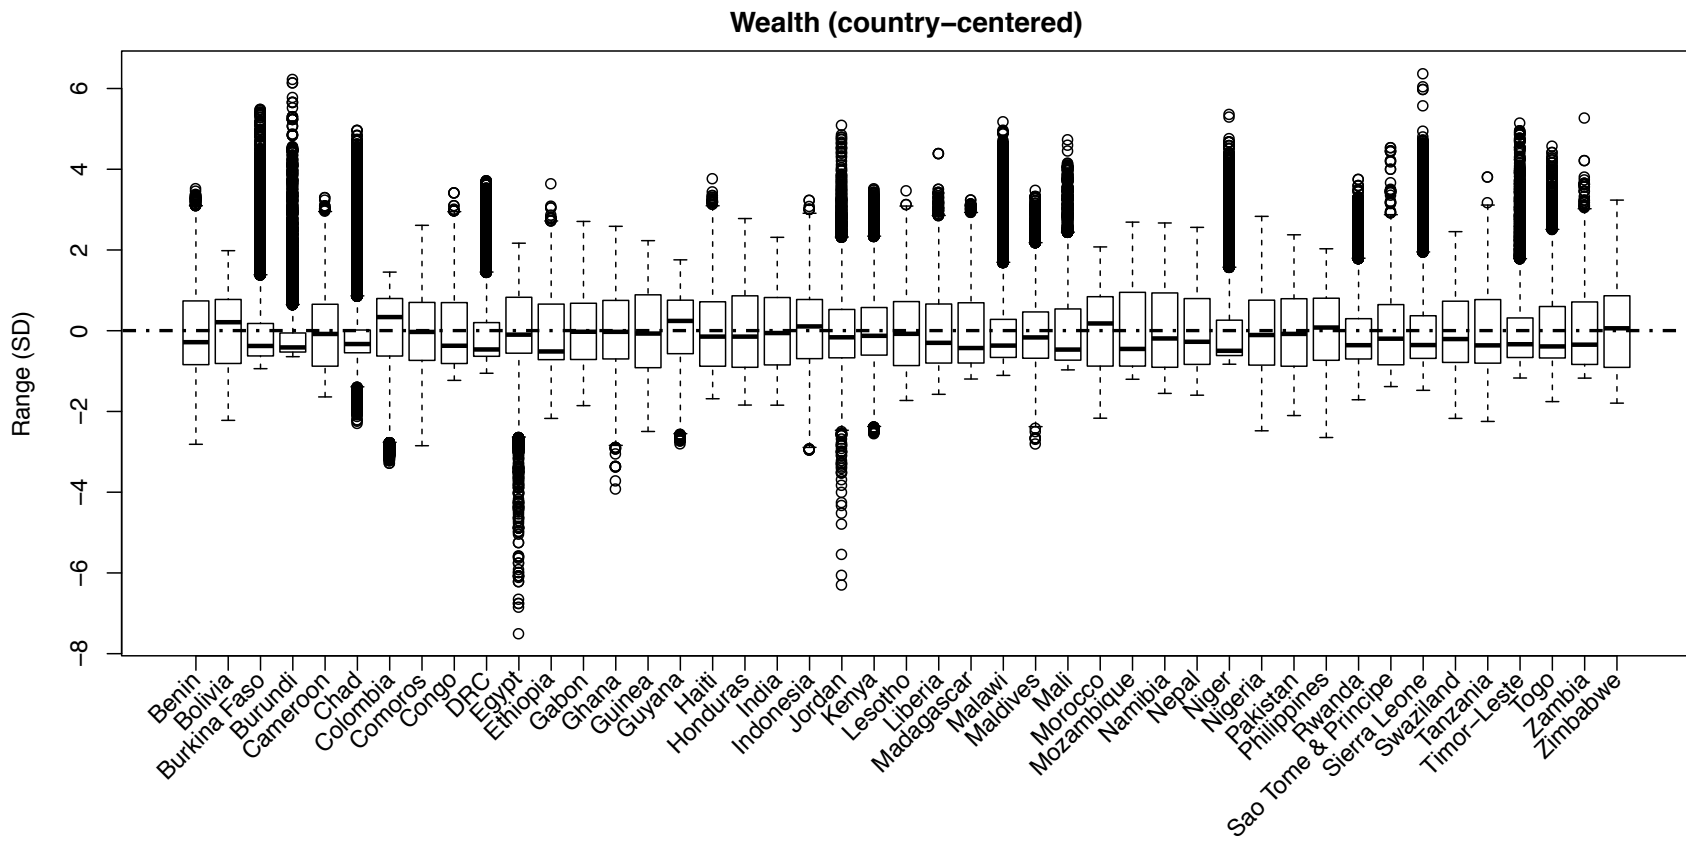

**Fig. S1** Distribution of wealth ranges (measured in standard deviations) across countries.

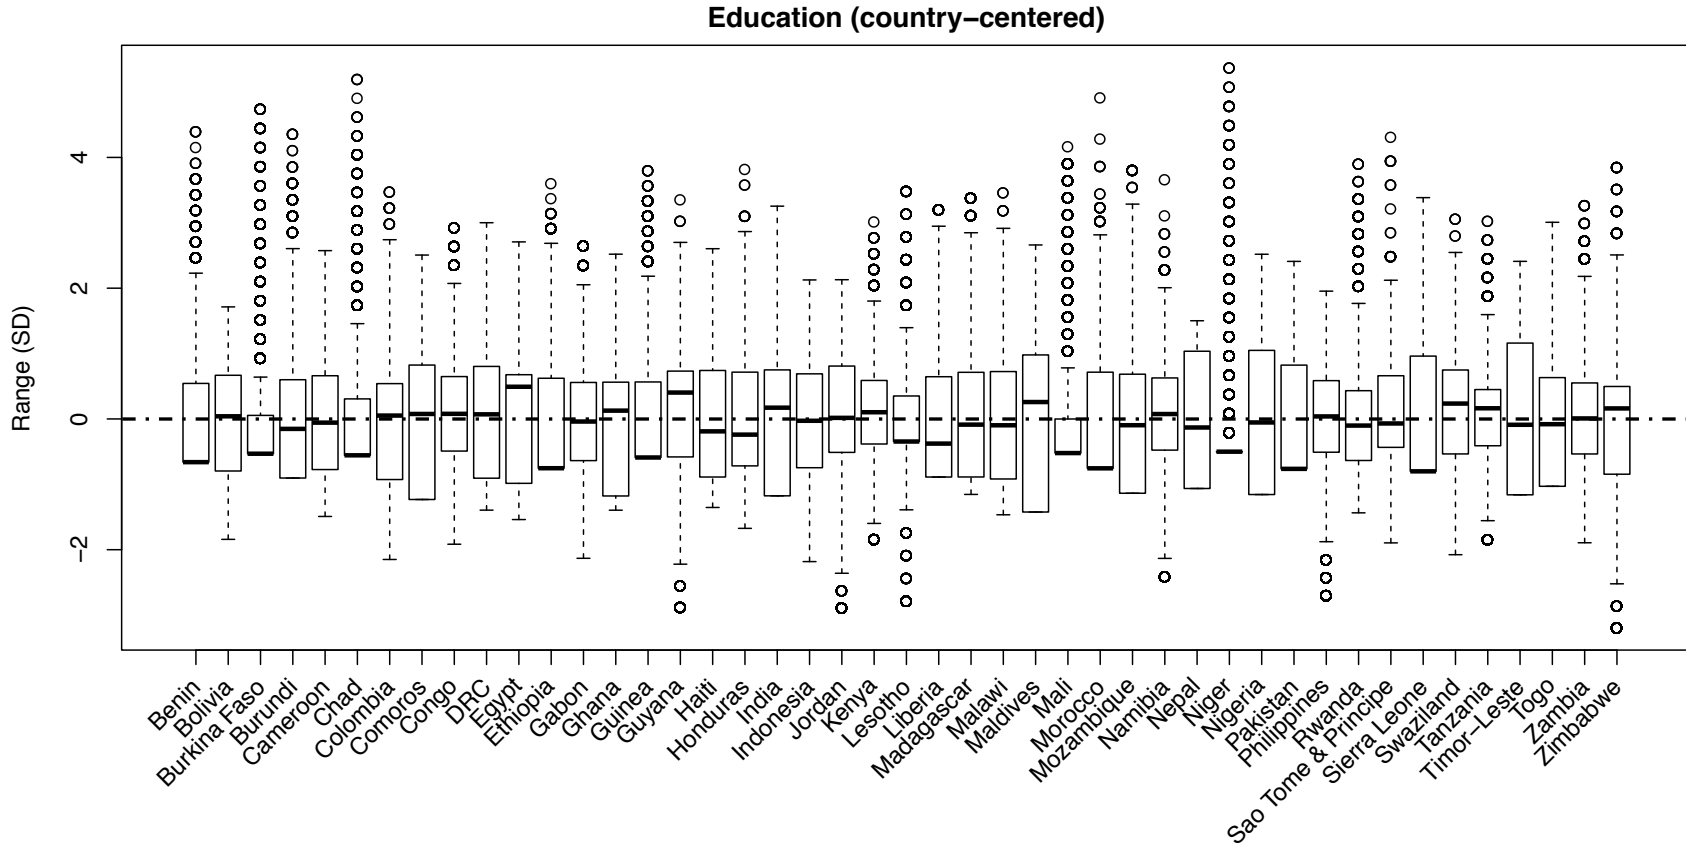

**Fig. S2** Distribution of education ranges (measured in standard deviations) across countries.

## Number of living children

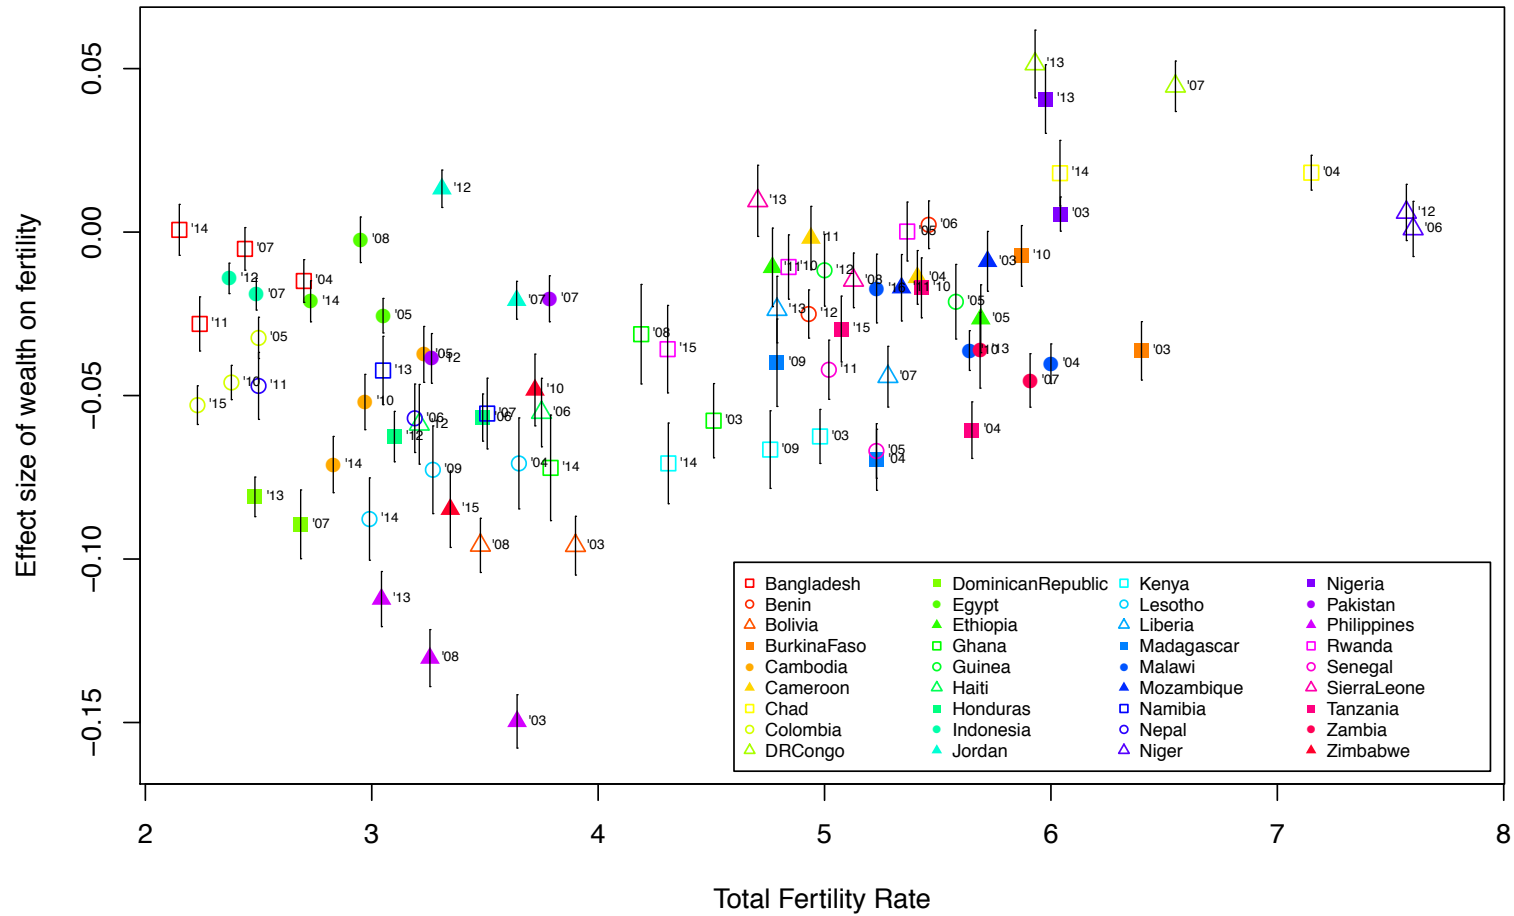

**Fig. S3** Beta coefficients ( $\pm$  standard errors) of wealth regressed on fertility (number of living children) for all countries with multiple waves of data in the DHS (85 waves in 36 countries).

## Number of living children

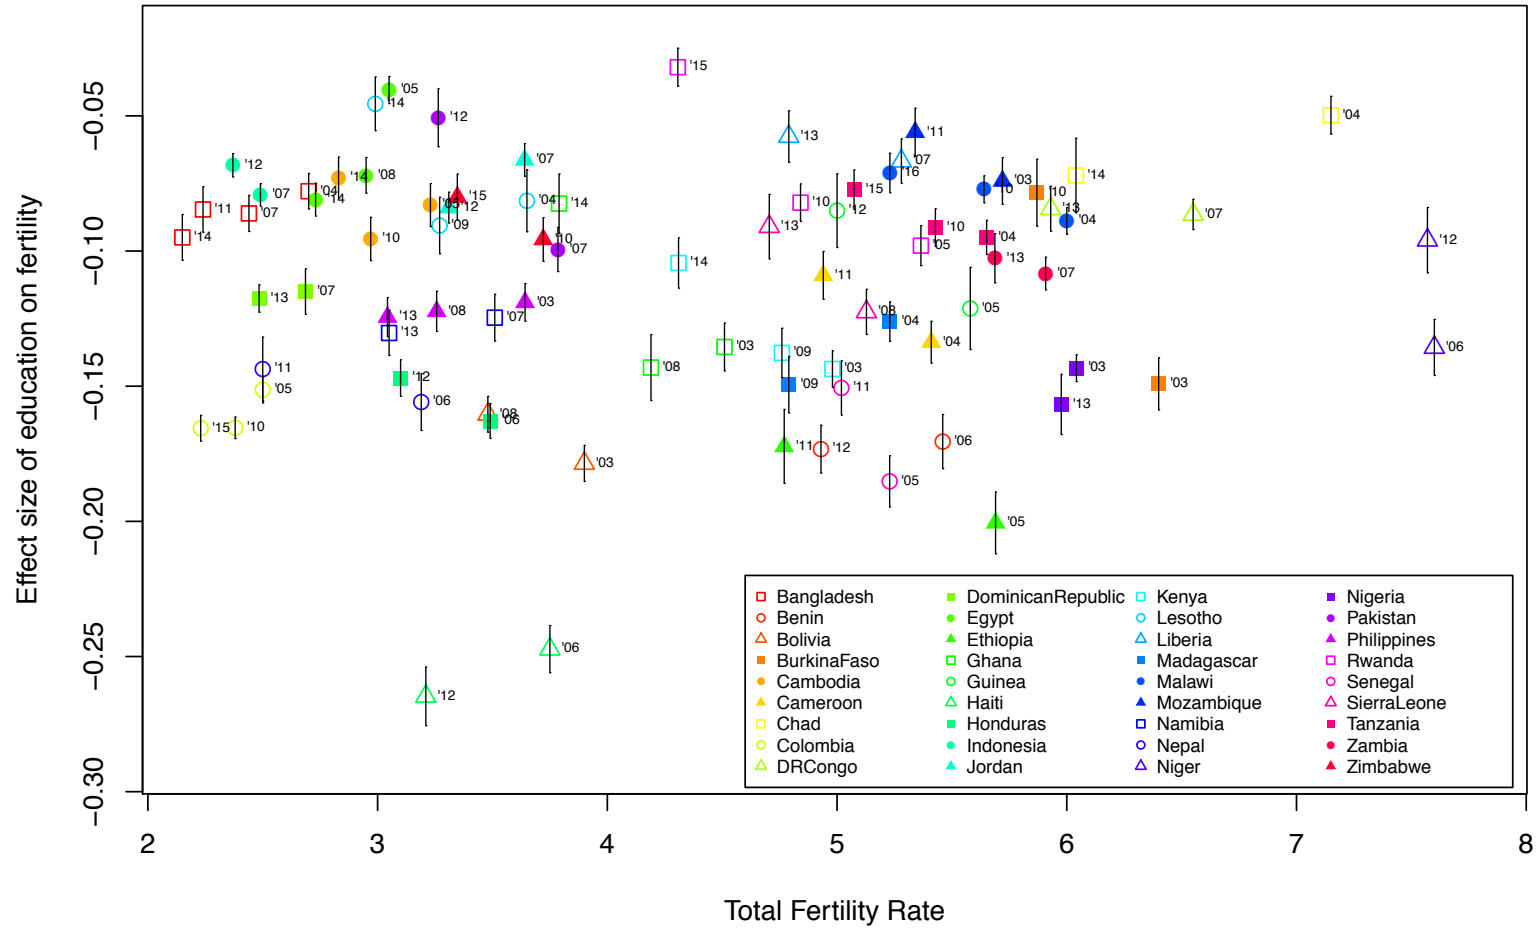

**Fig. S4** Beta coefficients ( $\pm$  standard errors) of education regressed on fertility (measured as number of living children) for all countries with multiple waves of data in the DHS (85 waves in 36 countries)

**Table S1** Sample characteristics by country for sample with one wave per country

| Country                      | Sample Size | Year Surveyed | Total Fertility Rate |
|------------------------------|-------------|---------------|----------------------|
| Benin                        | 16599       | 2011-2012     | 4.93                 |
| Bolivia                      | 16939       | 2008          | 3.48                 |
| Burkina Faso                 | 17087       | 2010          | 5.87                 |
| Burundi                      | 9389        | 2010          | 6.3                  |
| Cameroon                     | 15426       | 2011          | 4.94                 |
| Chad                         | 17719       | 2014-2015     | 6.04                 |
| Colombia                     | 49562       | 2010          | 2.38                 |
| Comoros                      | 5329        | 2012          | 4.78                 |
| Congo                        | 10819       | 2011-2012     | 5.05                 |
| Democratic Republic of Congo | 18827       | 2013          | 5.93                 |
| Egypt*                       | 21762       | 2014          | 2.73                 |
| Ethiopia                     | 16515       | 2003          | 6.05                 |
| Gabon                        | 8422        | 2012          | 4.14                 |
| Ghana                        | 9396        | 2014          | 3.79                 |
| Guinea                       | 9142        | 2012          | 5                    |
| Guyana                       | 4996        | 2009          | 2.72                 |
| Haiti                        | 14287       | 2012          | 3.21                 |
| Honduras                     | 22757       | 2011-2012     | 3.05                 |
| India                        | 124385      | 2005-2006     | 2.75                 |
| Indonesia                    | 45607       | 2012          | 2.37                 |
| Jordan*                      | 11352       | 2012          | 3.31                 |
| Kenya                        | 31079       | 2014          | 4.31                 |
| Lesotho                      | 6621        | 2014          | 2.99                 |
| Liberia                      | 9239        | 2013          | 4.79                 |
| Madagascar                   | 17375       | 2008-2009     | 4.72                 |
| Malawi                       | 23020       | 2010          | 5.64                 |
| Maldives*                    | 7131        | 2009          | 2.36                 |
| Mali                         | 10424       | 2012-2013     | 6.85                 |
| Morocco                      | 16798       | 2003          | 2.47                 |
| Mozambique                   | 13745       | 2011          | 5.34                 |
| Namibia                      | 9176        | 2013          | 3.05                 |
| Nepal                        | 12674       | 2011          | 2.5                  |
| Niger                        | 11160       | 2012          | 7.57                 |
| Nigeria                      | 38948       | 2013          | 5.98                 |
| Pakistan*                    | 13558       | 2012-2013     | 3.26                 |
| Philippines                  | 16155       | 2013          | 3.04                 |
| Rwanda                       | 13497       | 2014-2015     | 4.31                 |
| Sao Tome & Principe          | 2615        | 2008-2009     | 4.41                 |
| Sierra Leone                 | 16658       | 2013          | 4.71                 |
| Swaziland                    | 4987        | 2006-2007     | 3.82                 |
| Tanzania                     | 13266       | 2015-2016     | 5.07                 |
| Timor-Leste                  | 13137       | 2009-2010     | 6.36                 |
| Togo                         | 9480        | 2013-2014     | 4.64                 |
| Zambia                       | 16411       | 2013-2014     | 5.69                 |
| Zimbabwe <sup>^</sup>        | 9955        | 2015          | 3.35                 |
| Total                        | 803426      |               |                      |

Note: \* represents countries where only ever-married women were interviewed. <sup>^</sup> In Zimbabwe survey did not converge in the multi-level model, but is included in other models. In Colombia and in Jordan, women's work status was a binary variable. Total fertility rate was collected from <https://ourworldindata.org/grapher/total-fertility-rate?tab=data>

**Table S2** Sample characteristics for second sample with multiple waves per country

| Country                         | Sample Year 1      | Sample Year 2           | Sample Year 3     | TFR<br>Year 1 | TFR<br>Year 2 | TFR<br>Year 3 | Combined<br>Sample size |
|---------------------------------|--------------------|-------------------------|-------------------|---------------|---------------|---------------|-------------------------|
| Bangladesh                      | 2014*              | 2011*                   | 2007* (+2004*)    | 2.15          | 2.24          | 2.44 (2.70)   | 57,908                  |
| Benin                           | 2011-2012          | 2006                    |                   | 4.93          | 5.46          |               | 34,393                  |
| Bolivia                         | 2008               | 2003                    |                   | 3.48          | 3.9           |               | 34,593                  |
| Burkina Faso                    | 2010               | 2003                    |                   | 5.87          | 6.4           |               | 29,564                  |
| Cambodia                        | 2014               | 2010                    | 2005              | 2.83          | 2.97          | 3.23          | 53,155                  |
| Cameroon                        | 2011               | 2004                    |                   | 4.94          | 5.41          |               | 26,082                  |
| Chad                            | 2014-2015          | 2004                    |                   | 6.04          | 7.15          |               | 23,804                  |
| Colombia                        | 2015               | 2010 <sup>^</sup>       | 2005 <sup>^</sup> | 2.23          | 2.38          | 2.5           | 123,684                 |
| Democratic Republic<br>of Congo | 2013-2014          | 2007                    |                   | 5.93          | 6.55          |               | 28,822                  |
| Dominican Republic              | 2013               | 2007                    |                   | 2.48          | 2.69          |               | 36,567                  |
| Egypt                           | 2014*              | 2008*                   | 2005*             | 2.73          | 2.95          | 3.05          | 57,763                  |
| Ethiopia                        | 2011               | 2005                    |                   | 4.77          | 5.69          |               | 30,585                  |
| Ghana                           | 2014               | 2008                    | 2003              | 3.79          | 4.19          | 4.51          | 20,003                  |
| Guinea                          | 2012               | 2005                    |                   | 5             | 5.58          |               | 17,096                  |
| Haiti                           | 2012               | 2005-2006               |                   | 3.21          | 3.75          |               | 25,044                  |
| Honduras                        | 2011-2012          | 2005-2006               |                   | 3.1           | 3.49          |               | 42,705                  |
| Indonesia                       | 2012               | 2007*                   |                   | 2.37          | 2.49          |               | 78,502                  |
| Jordan                          | 2012* <sup>^</sup> | 2007* <sup>^</sup>      |                   | 3.31          | 3.64          |               | 22,228                  |
| Kenya                           | 2014               | 2008-2009               | 2003              | 4.31          | 4.76          | 4.98          | 47,718                  |
| Lesotho                         | 2014               | 2009                    | 2004              | 2.99          | 3.27          | 3.65          | 21,340                  |
| Liberia                         | 2013               | 2007                    |                   | 4.79          | 5.28          |               | 16,331                  |
| Madagascar                      | 2008-2009          | 2003-2004               |                   | 4.79          | 5.23          |               | 25,324                  |
| Malawi                          | 2015-2016          | 2010                    | 2004              | 5.23          | 5.64          | 6.00          | 59,280                  |
| Mozambique                      | 2011               | 2003                    |                   | 5.34          | 5.72          |               | 26,163                  |
| Namibia                         | 2013               | 2006-2007               |                   | 3.05          | 3.51          |               | 18,980                  |
| Nepal                           | 2011               | 2006                    |                   | 2.5           | 3.19          |               | 23,467                  |
| Niger                           | 2012               | 2006                    |                   | 7.57          | 7.6           |               | 20,383                  |
| Nigeria                         | 2013               | 2003                    |                   | 5.98          | 6.04          |               | 46,568                  |
| Pakistan                        | 2012-2013*         | 2006-2007* <sup>^</sup> |                   | 3.26          | 3.79          |               | 23,581                  |
| Philippines                     | 2013               | 2008                    | 2003              | 3.04          | 3.26          | 3.64          | 43,382                  |
| Rwanda                          | 2014-2015          | 2010                    | 2005              | 4.31          | 4.84          | 5.37          | 38,489                  |
| Senegal                         | 2010-2011          | 2005                    |                   | 5.02          | 5.23          |               | 30,290                  |
| Sierra Leone                    | 2013               | 2008                    |                   | 4.71          | 5.13          |               | 24,032                  |
| Tanzania                        | 2015-2016          | 2010                    | 2004-2005         | 5.07          | 5.43          | 5.65          | 33,734                  |
| Zambia                          | 2013-2014          | 2007                    |                   | 5.69          | 5.91          |               | 23,557                  |
| Zimbabwe                        | 2015               | 2010-2011               | 2005-2006         | 3.35          | 3.72          | 3.97          | 28,033                  |

Note: <sup>^</sup> women's work is a binary variable. \*only ever-married women surveyed



**Table S3** Fixed model coefficients from the multilevel varying slopes model of wealth, education, and mediators on number of live births, fit by maximum likelihood using the Laplace approximation.

**Multilevel Poisson model of number of live births**

**n individuals:** 802948  
**n countries:** 45

| <b>Random effects: Groups</b>        |                      |                 |                |                    |                    |
|--------------------------------------|----------------------|-----------------|----------------|--------------------|--------------------|
|                                      | <b>Name</b>          | <b>Variance</b> | <b>SD</b>      | <b>Correlation</b> |                    |
| country                              | (Intercept)          | 0.070           | 0.26           |                    |                    |
|                                      | wealth (centered)    | 0.001           | 0.04           | 0.64               |                    |
|                                      | education (centered) | 0.004           | 0.06           | 0.38               | -0.08              |
| <b>Fixed effects:</b>                |                      |                 |                |                    |                    |
|                                      | <b>Estimate</b>      | <b>SE</b>       | <b>z value</b> | <b>Pr(&gt; z )</b> |                    |
| (Intercept)                          | 0.849                | 0.039           | 21.80          | < 2e-16            | ***                |
| age                                  | 0.977                | 0.001           | 743.80         | < 2e-16            | ***                |
| age squared                          | -0.347               | 0.001           | -377.10        | < 2e-16            | ***                |
| wealth (centered)                    | -0.034               | 0.006           | -6.00          | 0.00               | ***                |
| education (centered)                 | -0.141               | 0.009           | -15.40         | < 2e-16            | ***                |
| womens work (none - reference)       | .                    | .               | .              | .                  | .                  |
| womens work (works occasionally)     | -0.029               | 0.005           | -6.00          | 0.00               | ***                |
| womens work (works seasonally)       | -0.018               | 0.002           | -9.60          | < 2e-16            | ***                |
| womens work (works all year)         | -0.008               | 0.002           | -3.50          | 0.00               | ***                |
| contraceptive use (none - reference) | -0.019               | 0.003           | -5.80          | 0.00               | ***                |
| contraceptive use (traditional)      | 0.206                | 0.003           | 62.40          | < 2e-16            | ***                |
| contraceptive use (modern)           | 0.239                | 0.002           | 142.10         | < 2e-16            | ***                |
| cluster mortality rate               | -0.002               | 0.001           | -2.50          | 0.01               | *                  |
| average number of births per cluster | 0.208                | 0.001           | 224.70         | < 2e-16            | ***                |
| interaction: wealth*education        | -0.029               | 0.001           | -38.00         | < 2e-16            | ***                |
| <b>Model fit statistics</b>          |                      |                 |                |                    |                    |
|                                      | <b>AIC</b>           | <b>BIC</b>      | <b>logLik</b>  | <b>deviance</b>    | <b>df residual</b> |
|                                      | 2449891              | 2450123         | -1224926       | 2449851            | 802928             |
| <b>Scaled residuals:</b>             |                      |                 |                |                    |                    |
|                                      | <b>Min</b>           | <b>1Q</b>       | <b>Median</b>  | <b>3Q</b>          | <b>Max</b>         |
|                                      | -3.2471              | -0.6396         | -0.1875        | 0.5327             | 6.8507             |

**Table S4** Varying slope coefficients for each country from the multilevel varying slopes model shown in Table S3 in ESM

| <b>Country</b>      | <b>Wealth (standardised)</b> |                       | <b>Education (standardised)</b> |                       |
|---------------------|------------------------------|-----------------------|---------------------------------|-----------------------|
|                     | <b>Beta coefficient</b>      | <b>Standard error</b> | <b>Beta coefficient</b>         | <b>Standard error</b> |
| Benin               | 0.00                         | 0.01                  | -0.16                           | 0.01                  |
| Bolivia             | -0.03                        | 0.01                  | -0.21                           | 0.01                  |
| Burkina Faso        | -0.02                        | 0.01                  | -0.16                           | 0.01                  |
| Burundi             | 0.02                         | 0.01                  | -0.15                           | 0.01                  |
| Cameroon            | -0.02                        | 0.01                  | -0.14                           | 0.01                  |
| Chad                | 0.02                         | 0.00                  | -0.05                           | 0.01                  |
| Colombia            | -0.08                        | 0.00                  | -0.16                           | 0.00                  |
| Comoros             | -0.04                        | 0.01                  | -0.31                           | 0.01                  |
| Congo               | -0.03                        | 0.01                  | -0.10                           | 0.01                  |
| DRC                 | 0.00                         | 0.01                  | -0.09                           | 0.00                  |
| Egypt               | -0.05                        | 0.00                  | -0.04                           | 0.00                  |
| Ethiopia            | -0.03                        | 0.01                  | -0.25                           | 0.01                  |
| Gabon               | -0.04                        | 0.01                  | -0.10                           | 0.01                  |
| Ghana               | -0.02                        | 0.01                  | -0.17                           | 0.01                  |
| Guinea              | -0.01                        | 0.01                  | -0.16                           | 0.01                  |
| Guyana              | -0.12                        | 0.01                  | -0.08                           | 0.01                  |
| Haiti               | -0.02                        | 0.01                  | -0.31                           | 0.01                  |
| Honduras            | -0.06                        | 0.01                  | -0.17                           | 0.01                  |
| India               | -0.08                        | 0.00                  | -0.15                           | 0.00                  |
| Indonesia           | -0.05                        | 0.00                  | -0.13                           | 0.00                  |
| Jordan              | -0.01                        | 0.01                  | -0.09                           | 0.01                  |
| Kenya               | -0.05                        | 0.00                  | -0.14                           | 0.00                  |
| Lesotho             | -0.10                        | 0.01                  | -0.11                           | 0.01                  |
| Liberia             | -0.02                        | 0.01                  | -0.08                           | 0.01                  |
| Madagascar          | -0.05                        | 0.01                  | -0.13                           | 0.01                  |
| Malawi              | -0.04                        | 0.00                  | -0.08                           | 0.00                  |
| Maldives            | -0.01                        | 0.01                  | -0.20                           | 0.01                  |
| Mali                | -0.01                        | 0.01                  | -0.08                           | 0.01                  |
| Morocco             | -0.01                        | 0.01                  | -0.29                           | 0.01                  |
| Mozambique          | -0.04                        | 0.01                  | -0.07                           | 0.01                  |
| Namibia             | -0.06                        | 0.01                  | -0.15                           | 0.01                  |
| Nepal               | -0.09                        | 0.01                  | -0.13                           | 0.01                  |
| Niger               | 0.03                         | 0.01                  | -0.12                           | 0.01                  |
| Nigeria             | 0.02                         | 0.00                  | -0.16                           | 0.00                  |
| Pakistan            | 0.00                         | 0.01                  | -0.09                           | 0.01                  |
| Philippines         | -0.13                        | 0.01                  | -0.15                           | 0.01                  |
| Rwanda              | -0.01                        | 0.01                  | -0.13                           | 0.01                  |
| Sao Tome & Principe | -0.03                        | 0.01                  | -0.14                           | 0.01                  |
| Sierra Leone        | -0.02                        | 0.01                  | -0.15                           | 0.01                  |
| Swaziland           | -0.07                        | 0.01                  | -0.13                           | 0.01                  |
| Tanzania            | -0.07                        | 0.01                  | -0.10                           | 0.01                  |
| Timor-Leste         | 0.02                         | 0.01                  | -0.13                           | 0.01                  |
| Togo                | -0.03                        | 0.01                  | -0.18                           | 0.01                  |
| Zambia              | -0.03                        | 0.01                  | -0.11                           | 0.01                  |
| Zimbabwe            | -0.06                        | 0.01                  | -0.12                           | 0.01                  |

**Table S5** Fixed model coefficients from the multilevel varying slopes model of wealth, education, and mediators on number of live births using unstandardized variables

| <b>Multilevel Poisson model of number of live births</b> |                 |                  |                |                    |                    |
|----------------------------------------------------------|-----------------|------------------|----------------|--------------------|--------------------|
| <b>n individuals:</b>                                    | 802948          |                  |                |                    |                    |
| <b>n countries:</b>                                      | 45              |                  |                |                    |                    |
| <hr/>                                                    |                 |                  |                |                    |                    |
| <b>Random effects: Groups</b>                            | <b>Name</b>     | <b>Variance</b>  | <b>SD</b>      | <b>Correlation</b> |                    |
| country                                                  | (Intercept)     | 0.052            | 0.23           |                    |                    |
|                                                          | wealth          | 0.001            | 0.03           | 0.46               |                    |
|                                                          | education       | 0.004            | 0.06           | 0.5                | 0.07               |
| <hr/>                                                    |                 |                  |                |                    |                    |
| <b>Fixed effects:</b>                                    | <b>Estimate</b> | <b>Std.Error</b> | <b>z value</b> | <b>Pr(&gt; z )</b> |                    |
| (Intercept)                                              | 0.837           | 0.034            | 24.70          | < 2e-16            | ***                |
| age                                                      | 0.977           | 0.001            | 743.70         | < 2e-16            | ***                |
| age squared                                              | -0.347          | 0.001            | -377.10        | < 2e-16            | ***                |
| wealth (unstandardised)                                  | -0.036          | 0.005            | -7.60          | 0.00               | ***                |
| education (unstandardised)                               | -0.170          | 0.009            | -18.10         | < 2e-16            | ***                |
| womens work (none - reference)                           | -0.029          | 0.005            | -6.00          | 0.00               | ***                |
| womens work (works occasionally)                         | -0.018          | 0.002            | -9.60          | < 2e-16            | ***                |
| womens work (works seasonally)                           | -0.008          | 0.002            | -3.50          | 0.00               | ***                |
| womens work (works all year)                             | -0.018          | 0.003            | -5.70          | 0.00               | ***                |
| contraceptive use (none - reference)                     | .               | .                | .              | .                  | .                  |
| contraceptive use (traditional)                          | 0.206           | 0.003            | 62.40          | < 2e-16            | ***                |
| contraceptive use (modern)                               | 0.239           | 0.002            | 142.10         | < 2e-16            | ***                |
| cluster mortality rate                                   | -0.002          | 0.001            | -2.30          | 0.02               | *                  |
| average number of births per cluster                     | 0.208           | 0.001            | 224.70         | < 2e-16            | ***                |
| interaction: wealth*education                            | -0.033          | 0.001            | -37.70         | < 2e-16            | ***                |
| <hr/>                                                    |                 |                  |                |                    |                    |
| <b>Model fit statistics</b>                              | <b>AIC</b>      | <b>BIC</b>       | <b>logLik</b>  | <b>deviance</b>    | <b>df residual</b> |
|                                                          | 2449894         | 2450126          | -1224927       | 2449854            | 802928             |
| <hr/>                                                    |                 |                  |                |                    |                    |
| <b>Scaled residuals:</b>                                 | <b>Min</b>      | <b>1Q</b>        | <b>Median</b>  | <b>3Q</b>          | <b>Max</b>         |
|                                                          | -3.2433         | -0.6397          | -0.1875        | 0.5328             | 6.8605             |
| <hr/>                                                    |                 |                  |                |                    |                    |

Note: Corr stands for correlation, 1Q represents first quartile, 3Q is the third quartile, logLik represents the log likelihood, df.resid refers to the degrees of freedom for the residuals, Pr(>|z|) represents the *P* value.

**Table S6** Varying slope coefficients from the multilevel varying slopes model using unstandardized variables shown in Table S5 in ESM

| Country             | Wealth (unstandardised) |                | Education (unstandardised) |                |
|---------------------|-------------------------|----------------|----------------------------|----------------|
|                     | Beta coefficient        | Standard error | Beta coefficient           | Standard error |
| Benin               | -0.02                   | 0.01           | -0.19                      | 0.01           |
| Bolivia             | -0.01                   | 0.01           | -0.21                      | 0.01           |
| Burkina Faso        | -0.05                   | 0.01           | -0.23                      | 0.01           |
| Burundi             | 0.01                    | 0.01           | -0.18                      | 0.01           |
| Cameroon            | -0.02                   | 0.01           | -0.16                      | 0.01           |
| Chad                | -0.01                   | 0.00           | -0.07                      | 0.01           |
| Colombia            | -0.07                   | 0.00           | -0.19                      | 0.00           |
| Comoros             | -0.05                   | 0.01           | -0.29                      | 0.01           |
| Congo               | -0.02                   | 0.01           | -0.13                      | 0.01           |
| DRC                 | 0.00                    | 0.01           | -0.10                      | 0.01           |
| Egypt               | -0.04                   | 0.01           | -0.04                      | 0.00           |
| Ethiopia            | -0.05                   | 0.01           | -0.27                      | 0.01           |
| Gabon               | -0.03                   | 0.01           | -0.14                      | 0.01           |
| Ghana               | -0.02                   | 0.01           | -0.19                      | 0.01           |
| Guinea              | -0.03                   | 0.01           | -0.18                      | 0.01           |
| Guyana              | -0.11                   | 0.01           | -0.13                      | 0.01           |
| Haiti               | -0.02                   | 0.01           | -0.35                      | 0.01           |
| Honduras            | -0.05                   | 0.01           | -0.20                      | 0.01           |
| India               | -0.08                   | 0.00           | -0.14                      | 0.00           |
| Indonesia           | -0.03                   | 0.00           | -0.15                      | 0.00           |
| Jordan              | 0.03                    | 0.01           | -0.11                      | 0.01           |
| Kenya               | -0.04                   | 0.00           | -0.17                      | 0.00           |
| Lesotho             | -0.08                   | 0.01           | -0.18                      | 0.02           |
| Liberia             | -0.04                   | 0.01           | -0.10                      | 0.01           |
| Madagascar          | -0.06                   | 0.01           | -0.18                      | 0.01           |
| Malawi              | -0.04                   | 0.00           | -0.10                      | 0.01           |
| Maldives            | -0.01                   | 0.01           | -0.24                      | 0.01           |
| Mali                | -0.04                   | 0.01           | -0.11                      | 0.01           |
| Morocco             | -0.03                   | 0.01           | -0.30                      | 0.01           |
| Mozambique          | -0.05                   | 0.01           | -0.09                      | 0.01           |
| Namibia             | -0.05                   | 0.01           | -0.20                      | 0.01           |
| Nepal               | -0.10                   | 0.01           | -0.15                      | 0.01           |
| Niger               | -0.01                   | 0.01           | -0.18                      | 0.01           |
| Nigeria             | 0.02                    | 0.00           | -0.15                      | 0.00           |
| Pakistan            | -0.02                   | 0.01           | -0.09                      | 0.01           |
| Philippines         | -0.10                   | 0.01           | -0.19                      | 0.01           |
| Rwanda              | -0.02                   | 0.01           | -0.17                      | 0.01           |
| Sao Tome & Principe | -0.04                   | 0.01           | -0.24                      | 0.02           |
| Sierra Leone        | -0.04                   | 0.01           | -0.16                      | 0.01           |
| Swaziland           | -0.06                   | 0.01           | -0.17                      | 0.01           |
| Tanzania            | -0.06                   | 0.01           | -0.14                      | 0.01           |
| Timor-Leste         | 0.02                    | 0.01           | -0.11                      | 0.01           |
| Togo                | -0.04                   | 0.01           | -0.21                      | 0.01           |
| Zambia              | -0.02                   | 0.01           | -0.14                      | 0.01           |
| Zimbabwe            | -0.03                   | 0.01           | -0.19                      | 0.01           |

**Table S7** Fixed model coefficients from the multilevel varying slopes model of wealth, education, and mediators on alternative outcome: number of living children

**Multilevel Poisson model of number of living children**

**n individuals:** 802948  
**n countries:** 45

| <b>Random effects: Groups</b>        |                      |                 |                |                    |                    |
|--------------------------------------|----------------------|-----------------|----------------|--------------------|--------------------|
|                                      | <b>Name</b>          | <b>Variance</b> | <b>SD</b>      | <b>Correlation</b> |                    |
| country                              | (Intercept)          | 0.071           | 0.27           |                    |                    |
|                                      | wealth (centered)    | 0.001           | 0.04           | 0.64               |                    |
|                                      | education (centered) | 0.004           | 0.06           | 0.38               | -0.07              |
| <b>Fixed effects:</b>                |                      |                 |                |                    |                    |
|                                      | <b>Estimate</b>      | <b>SE</b>       | <b>z value</b> | <b>Pr(&gt; z )</b> |                    |
| (Intercept)                          | 0.764                | 0.040           | 19.30          | 0.00               | ***                |
| age                                  | 0.954                | 0.001           | 692.70         | 0.00               | ***                |
| age squared                          | -0.354               | 0.001           | -362.70        | 0.00               | ***                |
| wealth (standardised)                | -0.031               | 0.006           | -5.50          | 0.00               | ***                |
| education (standardised)             | -0.132               | 0.009           | -14.50         | 0.00               | ***                |
| womens work (none - reference)       | -0.030               | 0.005           | -6.00          | 0.00               | ***                |
| womens work (works occasionally)     | -0.025               | 0.002           | -12.40         | 0.00               | ***                |
| womens work (works seasonally)       | -0.015               | 0.002           | -6.30          | 0.00               | ***                |
| womens work (works all year)         | -0.026               | 0.003           | -7.40          | 0.00               | ***                |
| contraceptive use (none - reference) | .                    | .               | .              | .                  | .                  |
| contraceptive use (traditiona)       | 0.227                | 0.003           | 66.10          | 0.00               | ***                |
| contraceptive use (modern)           | 0.266                | 0.002           | 150.00         | 0.00               | ***                |
| cluster mortality rate               | -0.082               | 0.001           | -82.30         | 0.00               | ***                |
| average number of births per cluster | 0.214                | 0.001           | 217.70         | 0.00               | ***                |
| interaction: wealth*education        | -0.029               | 0.001           | -36.50         | 0.00               | ***                |
| <b>Model fit statistics</b>          |                      |                 |                |                    |                    |
|                                      | <b>AIC</b>           | <b>BIC</b>      | <b>logLik</b>  | <b>deviance</b>    | <b>df residual</b> |
|                                      | 2352500              | 2352731         | -1176230       | 2352460            | 802928             |
| <b>Scaled residuals:</b>             |                      |                 |                |                    |                    |
|                                      | <b>Min</b>           | <b>1Q</b>       | <b>Median</b>  | <b>3Q</b>          | <b>Max</b>         |
|                                      | -2.9681              | -0.6239         | -0.1868        | 0.5272             | 6.8214             |

Note: Corr stands for correlation, 1Q represents first quartile, 3Q is the third quartile, logLik represents the log likelihood, df.resid refers to the degrees of freedom for the residuals, Pr(>|z|) represents the *P* value.

**Table S8** Varying slope coefficients from the multilevel varying slopes model of wealth, education, and mediators on alternative outcome: number of living children

| Country             | WEALTH           |                | EDUCATION        |                |
|---------------------|------------------|----------------|------------------|----------------|
|                     | Beta coefficient | Standard error | Beta coefficient | Standard error |
| Benin               | 0.00             | 0.01           | -0.16            | 0.01           |
| Bolivia             | -0.03            | 0.01           | -0.19            | 0.01           |
| Burkina Faso        | -0.01            | 0.01           | -0.14            | 0.01           |
| Burundi             | 0.02             | 0.01           | -0.13            | 0.01           |
| Cameroon            | -0.02            | 0.01           | -0.13            | 0.01           |
| Chad                | 0.02             | 0.00           | -0.04            | 0.01           |
| Colombia            | -0.08            | 0.00           | -0.16            | 0.00           |
| Comoros             | -0.03            | 0.01           | -0.31            | 0.01           |
| Congo               | -0.03            | 0.01           | -0.09            | 0.01           |
| DRC                 | 0.00             | 0.01           | -0.08            | 0.01           |
| Egypt               | -0.05            | 0.00           | -0.03            | 0.00           |
| Ethiopia            | -0.03            | 0.01           | -0.23            | 0.01           |
| Gabon               | -0.04            | 0.01           | -0.10            | 0.01           |
| Ghana               | -0.02            | 0.01           | -0.17            | 0.01           |
| Guinea              | -0.01            | 0.01           | -0.15            | 0.01           |
| Guyana              | -0.12            | 0.01           | -0.08            | 0.01           |
| Haiti               | -0.02            | 0.01           | -0.29            | 0.01           |
| Honduras            | -0.05            | 0.01           | -0.17            | 0.01           |
| India               | -0.07            | 0.00           | -0.14            | 0.00           |
| Indonesia           | -0.05            | 0.00           | -0.11            | 0.00           |
| Jordan              | 0.00             | 0.01           | -0.09            | 0.01           |
| Kenya               | -0.04            | 0.00           | -0.13            | 0.00           |
| Lesotho             | -0.09            | 0.01           | -0.10            | 0.01           |
| Liberia             | -0.02            | 0.01           | -0.06            | 0.01           |
| Madagascar          | -0.05            | 0.01           | -0.13            | 0.01           |
| Malawi              | -0.04            | 0.01           | -0.06            | 0.00           |
| Maldives            | -0.01            | 0.01           | -0.19            | 0.01           |
| Mali                | -0.01            | 0.01           | -0.08            | 0.01           |
| Morocco             | 0.00             | 0.01           | -0.28            | 0.01           |
| Mozambique          | -0.04            | 0.01           | -0.06            | 0.01           |
| Namibia             | -0.06            | 0.01           | -0.14            | 0.01           |
| Nepal               | -0.09            | 0.01           | -0.12            | 0.01           |
| Niger               | 0.03             | 0.01           | -0.11            | 0.01           |
| Nigeria             | 0.03             | 0.00           | -0.15            | 0.00           |
| Pakistan            | 0.00             | 0.01           | -0.08            | 0.01           |
| Philippines         | -0.13            | 0.01           | -0.14            | 0.01           |
| Rwanda              | -0.01            | 0.01           | -0.12            | 0.01           |
| Sao Tome & Principe | -0.02            | 0.01           | -0.13            | 0.01           |
| Sierra Leone        | -0.02            | 0.01           | -0.13            | 0.01           |
| Swaziland           | -0.07            | 0.01           | -0.12            | 0.01           |
| Tanzania            | -0.07            | 0.01           | -0.10            | 0.01           |
| Timor-Leste         | 0.02             | 0.01           | -0.12            | 0.01           |
| Togo                | -0.03            | 0.01           | -0.17            | 0.01           |
| Zambia              | -0.02            | 0.01           | -0.10            | 0.01           |
| Zimbabwe            | -0.05            | 0.01           | -0.11            | 0.01           |

**Table S9** Fixed model coefficients from the multilevel varying slopes model of wealth, education, and mediators on alternative outcome: number of living children using unstandardized variables

**Multilevel Poisson model of number of living children**

**n individuals:** 802948

**n countries:** 45

| <b>Random effects: Groups</b>        |                 |                 |                |                    |                    |
|--------------------------------------|-----------------|-----------------|----------------|--------------------|--------------------|
|                                      | <b>Name</b>     | <b>Variance</b> | <b>SD</b>      | <b>Correlation</b> |                    |
| country                              | (Intercept)     | 0.054           | 0.23           |                    |                    |
|                                      | wealth          | 0.001           | 0.03           | 0.440              |                    |
|                                      | education       | 0.004           | 0.06           | 0.500              | 0.060              |
| <b>Fixed effects:</b>                |                 |                 |                |                    |                    |
|                                      | <b>Estimate</b> | <b>SE</b>       | <b>z value</b> | <b>Pr(&gt; z )</b> |                    |
| (Intercept)                          | 0.754           | 0.035           | 21.80          | 0.00               | ***                |
| age                                  | 0.954           | 0.001           | 692.60         | 0.00               | ***                |
| age squared                          | -0.354          | 0.001           | -362.70        | 0.00               | ***                |
| wealth (unstandardised)              | -0.033          | 0.005           | -7.00          | 0.00               | ***                |
| education (unstandardised)           | -0.158          | 0.009           | -17.00         | 0.00               | ***                |
| womens work (none - reference)       | -0.030          | 0.005           | -6.00          | 0.00               | ***                |
| womens work (works occasionally)     | -0.025          | 0.002           | -12.40         | 0.00               | ***                |
| womens work (works seasonally)       | -0.015          | 0.002           | -6.30          | 0.00               | ***                |
| womens work (works all year)         | -0.025          | 0.003           | -7.30          | 0.00               | ***                |
| contraceptive use (none - reference) | .               | .               | .              | .                  | .                  |
| contraceptive use (traditiona)       | 0.227           | 0.003           | 66.10          | 0.00               | ***                |
| contraceptive use (modern)           | 0.266           | 0.002           | 150.00         | 0.00               | ***                |
| cluster mortality rate               | -0.082          | 0.001           | -82.10         | 0.00               | ***                |
| average number of births per cluster | 0.214           | 0.001           | 217.60         | 0.00               | ***                |
| interaction: wealth*education        | -0.033          | 0.001           | -36.50         | 0.00               | ***                |
| <b>Model fit statistics</b>          |                 |                 |                |                    |                    |
|                                      | <b>AIC</b>      | <b>BIC</b>      | <b>logLik</b>  | <b>deviance</b>    | <b>df residual</b> |
|                                      | 2352482         | 2352714         | -1176221       | 2352442            | 802928             |
| <b>Scaled residuals:</b>             |                 |                 |                |                    |                    |
|                                      | <b>Min</b>      | <b>1Q</b>       | <b>Median</b>  | <b>3Q</b>          | <b>Max</b>         |
|                                      | -2.9636         | -0.6238         | -0.1867        | 0.5274             | 6.831              |

**Table S10:** Varying slope coefficients from the multilevel varying slopes model of wealth, education, and mediators on alternative outcome: number of living children using unstandardized variables

| Country             | WEALTH (unstandardised) |                | EDUCATION (unstandardised) |                |
|---------------------|-------------------------|----------------|----------------------------|----------------|
|                     | Beta coefficient        | Standard error | Beta coefficient           | Standard error |
| Benin               | -0.02                   | 0.01           | -0.19                      | 0.01           |
| Bolivia             | -0.02                   | 0.01           | -0.19                      | 0.01           |
| Burkina Faso        | -0.04                   | 0.01           | -0.21                      | 0.01           |
| Burundi             | 0.01                    | 0.01           | -0.16                      | 0.01           |
| Cameroon            | -0.02                   | 0.01           | -0.15                      | 0.01           |
| Chad                | -0.01                   | 0.01           | -0.07                      | 0.01           |
| Colombia            | -0.06                   | 0.00           | -0.19                      | 0.00           |
| Comoros             | -0.04                   | 0.01           | -0.29                      | 0.01           |
| Congo               | -0.03                   | 0.01           | -0.12                      | 0.01           |
| DRC                 | 0.00                    | 0.01           | -0.10                      | 0.01           |
| Egypt               | -0.04                   | 0.01           | -0.03                      | 0.00           |
| Ethiopia            | -0.05                   | 0.01           | -0.25                      | 0.01           |
| Gabon               | -0.03                   | 0.01           | -0.14                      | 0.01           |
| Ghana               | -0.02                   | 0.01           | -0.18                      | 0.01           |
| Guinea              | -0.03                   | 0.01           | -0.17                      | 0.01           |
| Guyana              | -0.10                   | 0.01           | -0.13                      | 0.01           |
| Haiti               | -0.03                   | 0.01           | -0.33                      | 0.01           |
| Honduras            | -0.05                   | 0.01           | -0.20                      | 0.01           |
| India               | -0.07                   | 0.00           | -0.13                      | 0.00           |
| Indonesia           | -0.03                   | 0.00           | -0.13                      | 0.00           |
| Jordan              | 0.03                    | 0.01           | -0.11                      | 0.01           |
| Kenya               | -0.03                   | 0.00           | -0.16                      | 0.01           |
| Lesotho             | -0.08                   | 0.01           | -0.17                      | 0.02           |
| Liberia             | -0.04                   | 0.01           | -0.07                      | 0.01           |
| Madagascar          | -0.06                   | 0.01           | -0.17                      | 0.01           |
| Malawi              | -0.04                   | 0.00           | -0.07                      | 0.01           |
| Maldives            | -0.01                   | 0.01           | -0.22                      | 0.01           |
| Mali                | -0.04                   | 0.01           | -0.11                      | 0.01           |
| Morocco             | -0.02                   | 0.01           | -0.29                      | 0.01           |
| Mozambique          | -0.05                   | 0.01           | -0.08                      | 0.01           |
| Namibia             | -0.04                   | 0.01           | -0.19                      | 0.01           |
| Nepal               | -0.10                   | 0.01           | -0.14                      | 0.01           |
| Niger               | 0.00                    | 0.01           | -0.16                      | 0.01           |
| Nigeria             | 0.03                    | 0.00           | -0.14                      | 0.00           |
| Pakistan            | -0.01                   | 0.01           | -0.08                      | 0.01           |
| Philippines         | -0.10                   | 0.01           | -0.18                      | 0.01           |
| Rwanda              | -0.01                   | 0.01           | -0.15                      | 0.01           |
| Sao Tome & Principe | -0.03                   | 0.01           | -0.22                      | 0.02           |
| Sierra Leone        | -0.04                   | 0.01           | -0.14                      | 0.01           |
| Swaziland           | -0.06                   | 0.01           | -0.16                      | 0.01           |
| Tanzania            | -0.06                   | 0.01           | -0.13                      | 0.01           |
| Timor-Leste         | 0.02                    | 0.01           | -0.11                      | 0.01           |
| Togo                | -0.04                   | 0.01           | -0.20                      | 0.01           |
| Zambia              | -0.02                   | 0.01           | -0.13                      | 0.01           |
| Zimbabwe            | -0.03                   | 0.01           | -0.17                      | 0.01           |
